# Supplementary material for: ViruSurf: an integrated database to investigate viral sequences
Source: PubMed Central journal article supplement (PMC7778888; doi:10.1093/nar/gkaa846), 2020-10-12
Supplement: gkaa846_supplemental_file.pdf [file gkaa846_supplemental_file.pdf]

## Virusurf supplementary data

Arif Canakoglu<sup>1,\*</sup>, Pietro Pinoli<sup>1,\*</sup>, Anna Bernasconi<sup>1</sup>,  
Tommaso Alfonsi<sup>1</sup>, Damianos P. Melidis<sup>2</sup> and Stefano Ceri<sup>1†</sup>

<sup>1</sup>Dipartimento di Elettronica, Informazione e Bioingegneria, Politecnico di Milano, Via Ponzio  
34/5, 20133 Milano, Italy

<sup>2</sup>L3S Research Center, Leibniz University Hannover, Appelstr. 9a, 30167 Hannover, Germany

---

\*Co-first authors

†Corresponding author. Tel: +39 02 2399 3532; Fax: +39 02 2399 3411; Email: stefano.ceri@polimi.it

Table S1: Description of Attributes in the Logical schema

---

SEQUENCE contains virus sequences expressed as strings of nucleotides (encoded in the `nucleotide_sequence` field). `Accession_id` is a unique key used to backtrack the sequence in its original database. Eventually, we also store an `alternative_accession_id`, in case the sequence is also present in a second public database. Sequences belong to a specific `strain_name`; they are either reference or normal sequences (`is_reference`), complete or partial (`is_complete`), thus with a certain `length`; they correspond to a positive or negative `strand` (strictly dependent on the type of virus, that could be single/double strand). We also compute two useful values: the percentage of G and C bases (`gc_percentage`) and of unknown (N) bases (`n_percentage`) throughout the sequence, for quality assessment purposes. When available, we store `lineage` and associated `clade` to which the sequence belongs, as computed by GISAID. As a central table, the Sequence table contains four foreign keys fields to connect to `Virus`, `HostSample`, `SequencingProject` and `ExperimentType` tables.

---

VIRUS captures the relevant information of the analyzed species, summarizing the most important levels of the taxonomy branch it belongs to. Specifically, the `taxon_id` – with the corresponding literal specification `taxon_name` – corresponds to the numerical ID of the NCBI Taxonomy (<https://www.ncbi.nlm.nih.gov/taxonomy>) term describing the virus. This belongs to a `species` that derives from a `genus`, which is part of a `sub_family` that in turn is within a `family`. In addition, `equivalent_list` contains an array of alternative terminology for the same species. As to the specific molecule of the virus, we store the type (DNA/RNA) in `molecule_type` and the other structural characteristics in `is_single_stranded` and `is_positive_stranded`.

---

HOSTSAMPLE represents the biological sample from the host organism. Its NCBI Taxonomy nomenclature is identified by the `host_taxon_id` and related `host_taxon_name`. `Collection_date` captures the temporal information of sequence extraction from an `isolation_source` in an `originating_lab`, which is in a `region`, within a `country`, inside a `geo_group`. In rare cases also the host organism `age` and `gender` are available.

---

EXPERIMENTTYPE stores information regarding the experiment used to retrieve sequences from biological samples. This regards the `sequencing_technology`, the `assembly_method` and the `coverage` (i.e., number of unique reads that include a specific nucleotide in the reconstructed sequence).

---

SEQUENCINGPROJECT captures information about the organization that stands behind the collected sequence. Usually there is information about a `sequencing_lab` (also referred to as “submitting lab”, the `submission_date` (different from the date of collection, captured in the HOSTSAMPLE entity), the `database_source`, indicating the original database from which ViruSurf collects the information, and the `bioproject_id` when available (an external reference to the NCBI BioProject database <https://www.ncbi.nlm.nih.gov/bioproject/>).

---

ANNOTATION contains information on the structure of the full sequence. Each sub-sequence is defined by a `feature_type` (e.g., gene, protein, coding DNA region, or untranslated region, molecule patterns such as stem loops and so on), coordinates (`start` and `stop`), the containing `gene_name`, the product protein. For annotations related to proteins, we store the corresponding pre-computed `nucleotide_sequence`, `aminoacid_sequence`, and an `external_reference` corresponding to NCBI Protein accessions.

---

NUCLEOTIDEVARIANT contains the variants of a specific sequence, computed with respect to the “reference sequence” that is most adopted for the concerned virus species. Characterizing fields include `sequence_original` and `sequence_alternative`, referring respectively to the positions `start_original` and `start_alternative`. `Variant_length` and `variant_type` (e.g., DEL, INS, SUB) complete the identifying information.

---

VARIANTIMPACT includes annotations of each variant about its `effect` (e.g., disruptive, conservative, synonymous) on known genes (`impacted_gene_name`) with a certain `putative_impact` (e.g., LOW, MODERATE, HIGH, MODIFIER).

---

AMINOACIDVARIANT contains the variants w.r.t. an amino acid sequence stored in the specific ANNOTATION. As for the variants of nucleotides, we store the information about the original/alternative sequence, the start position, the length and type of variant.

---

Table S2: Mappings between variables of ViruSurf and variables of NCBI direct sources (API Nuccore <https://www.ncbi.nlm.nih.gov/books/NBK25497/> and HTML interface <https://www.ncbi.nlm.nih.gov/labs/virus/vssi/#/virus>). For NCBI we specify both the terminology used in the xml/json export files and the one used in their interfaces. In each cell we specify the mapped field, or ✓ if that field is calculated by our pipelines (for example most information about the Virus are computed using the NCBI Taxonomy services), or × when that information is not available. Sometimes we report the double values (e.g., INSDCQualifier/host), this notation indicates that the same information is available under two different elements.

| VirusSurf                           | NCBI Nuccore                          | NCBI Virus HTML  |
|-------------------------------------|---------------------------------------|------------------|
| Sequence.AccessionId                | INSDSeq_accession-version             | Accession        |
| Sequence.AlternativeAccession       | ×                                     | ×                |
| Sequence.StrainName                 | INSDQualifier_value/isolate           | GenBank_Title    |
| Sequence.IsReference                | INSDKeyword                           | ×                |
| Sequence.IsComplete                 | INSDSeq_definition                    | Nuc_Completeness |
| Sequence.Strand                     | ✓                                     | ×                |
| Sequence.Length                     | INSDSeq_length                        | Length           |
| Sequence.GC%                        | ✓                                     | ×                |
| Sequence.N%                         | ✓                                     | ×                |
| Sequence.Clade                      | ×                                     | ×                |
| Sequence.Lineage                    | ×                                     | ×                |
| Virus.TaxonomyID                    | ✓                                     | ×                |
| Virus.TaxonomyName                  | INSDSeq_organism                      | GenBank_Title    |
| Virus.Species                       | ✓                                     | Species          |
| Virus.Genus                         | ✓                                     | Genus            |
| Virus.Subfamily                     | ✓                                     | ×                |
| Virus.Family                        | ✓                                     | Family           |
| Virus.EquivalentList                | ✓                                     | ×                |
| Virus.MoleculeType                  | INSDSeq_moltype                       | ×                |
| Virus.SingleStranded                | INSDSeq_strandedness                  | ×                |
| Virus.PositiveStranded              | ✓                                     | ×                |
| HostSample.TaxonomyID               | ✓                                     | ×                |
| HostSample.TaxonomyName             | INSDQualifier_value/host              | Host             |
| HostSample.CollectionDate           | INSDQualifier_value/collection_date   | Collection_Date  |
| HostSample.IsolationSource          | INSDQualifier_value/isolation_source  | Isolation_Source |
| HostSample.Originating Lab          | ×                                     | ×                |
| HostSample.GeoGroup                 | ✓                                     | ×                |
| HostSample.Country                  | INSDQualifier_value/country           | Geo_Location     |
| HostSample.Region                   | INSDQualifier_value/country           | Geo_Location     |
| HostSample.Age                      | INSDQualifier_value/host              | ×                |
| HostSample.Gender                   | INSDQualifier_value/host              | ×                |
| ExperimentType.SequencingTechnology | INSDSeq_comment/Sequencing Technology | ×                |
| ExperimentType.AssemblyMethod       | INSDSeq_comment/Assembly Method       | ×                |
| ExperimentType.Coverage             | INSDSeq_comment/Coverage              | ×                |
| SequencingProject.SubmissionDate    | INSDReference_title/Direct Submission | ×                |
| SequencingProject.SequencingLab     | INSDReference_title/Direct Submission | ×                |
| SequencingProject.DatabaseSource    | ✓                                     | Sequence_Type    |
| SequencingProject.BioprojectId      | INSDXref_id/BioProject                | ×                |

Table S3: Mappings between variables of ViruSurf and of COG-UK metadata file, provided in CSV format on their web page (<https://www.cogconsortium.uk/data/>). The notation used is the same as for Table 2.

| ViruSurf                            | COG-UK metadata csv |
|-------------------------------------|---------------------|
| Sequence.AccessionId                | sequence_name       |
| Sequence.AlternativeAccession       | ×                   |
| Sequence.StrainName                 | sequence_name       |
| Sequence.IsReference                | ✓                   |
| Sequence.IsComplete                 | ✓                   |
| Sequence.Strand                     | ✓                   |
| Sequence.Length                     | ✓                   |
| Sequence.GC%                        | ✓                   |
| Sequence.N%                         | ✓                   |
| Sequence.Clade                      | ×                   |
| Sequence.Lineage                    | lineage             |
| Virus.TaxonomyID                    | ✓                   |
| Virus.TaxonomyName                  | ✓                   |
| Virus.Species                       | ✓                   |
| Virus.Genus                         | ✓                   |
| Virus.Subfamily                     | ✓                   |
| Virus.Family                        | ✓                   |
| Virus.EquivalentList                | ✓                   |
| Virus.MoleculeType                  | ✓                   |
| Virus.SingleStranded                | ✓                   |
| Virus.PositiveStranded              | ✓                   |
| HostSample.TaxonomyID               | ✓                   |
| HostSample.TaxonomyName             | ✓                   |
| HostSample.CollectionDate           | sample_date         |
| HostSample.IsolationSource          | ×                   |
| HostSample.Originating Lab          | ×                   |
| HostSample.GeoGroup                 | ✓                   |
| HostSample.Country                  | country             |
| HostSample.Region                   | adm1                |
| HostSample.Age                      | ×                   |
| HostSample.Gender                   | ×                   |
| ExperimentType.SequencingTechnology | ×                   |
| ExperimentType.AssemblyMethod       | ×                   |
| ExperimentType.Coverage             | ×                   |
| SequencingProject.SubmissionDate    | ×                   |
| SequencingProject.SequencingLab     | ×                   |
| SequencingProject.DatabaseSource    | ✓                   |
| SequencingProject.BioprojectId      | ×                   |

Table S4: Mappings between variables of ViruSurf and of NMDC metadata file, provided in JSON and HTML format on their Web page (<http://nmdc.cn/nCov/globalgenesequence/detail/>, followed by the sequence id, e.g., “NMDC60013002-07”). The notation used is the same as for Table 2. Sometimes we report the double values (e.g., glength/✓), this notation indicates that when information is missing in the input file, it is computed by our pipeline.

| ViruSurf                            | NMDC json            | NMDC HTML          |
|-------------------------------------|----------------------|--------------------|
| Sequence.AccessionId                | seqName              | NMDC Accession     |
| Sequence.AlternativeAccession       | gisaid               | Gisa Id            |
| Sequence.StrainName                 | isolate              | Isolation Strain   |
| Sequence.IsReference                | ✓                    | ×                  |
| Sequence.IsComplete                 | ✓                    | ×                  |
| Sequence.Strand                     | ✓                    | ×                  |
| Sequence.Length                     | glength/✓            | Length/✓           |
| Sequence.GC%                        | ✓                    | ×                  |
| Sequence.N%                         | ✓                    | ×                  |
| Sequence.Clade                      | ×                    | ×                  |
| Sequence.Lineage                    | ×                    | ×                  |
| Virus.TaxonomyID                    | ✓                    | ×                  |
| Virus.TaxonomyName                  | spciesname           | Organism           |
| Virus.Species                       | ✓                    | ×                  |
| Virus.Genus                         | ✓                    | ×                  |
| Virus.Subfamily                     | ✓                    | ×                  |
| Virus.Family                        | ✓                    | ×                  |
| Virus.EquivalentList                | ✓                    | ×                  |
| Virus.MoleculeType                  | ✓                    | ×                  |
| Virus.SingleStranded                | ✓                    | ×                  |
| Virus.PositiveStranded              | ✓                    | ×                  |
| HostSample.TaxonomyID               | ✓                    | ×                  |
| HostSample.TaxonomyName             | host                 | Host               |
| HostSample.CollectionDate           | collectionDateFormat | Collection Date    |
| HostSample.IsolationSource          | isolationSource      | Isolate Name       |
| HostSample.Originating Lab          | samplingPlace        | Sampling Place     |
| HostSample.GeoGroup                 | ✓/Country            | Country            |
| HostSample.Country                  | country              | Country            |
| HostSample.Region                   | country              | Country            |
| HostSample.Age                      | ×                    | ×                  |
| HostSample.Gender                   | ×                    | ×                  |
| ExperimentType.SequencingTechnology | sequencingMethods    | Sequencing Methods |
| ExperimentType.AssemblyMethod       | jointMethods         | Joint Methods      |
| ExperimentType.Coverage             | ×                    | ×                  |
| SequencingProject.SubmissionDate    | submitDateFormat     | ×                  |
| SequencingProject.SequencingLab     | dept                 | Organization       |
| SequencingProject.DatabaseSource    | ✓                    | ×                  |
| SequencingProject.BioprojectId      | ×                    | ×                  |

Table S5: Mappings between variables of ViruSurf and of GISAID metadata file, provided in JSON (as an export file prepared for ViruSurf ad-hoc) and HTML format on GISAID portal, via authorized login. The notation used is the same as for Table 2.

| VirusSurf                           | EpiCoV export json   | EpiCoV HTML              |
|-------------------------------------|----------------------|--------------------------|
| Sequence.AccessionId                | covv_accession_id    | Accession ID             |
| Sequence.AlternativeAccession       | ×                    | ×                        |
| Sequence.StrainName                 | covv_virus_name      | Virus name               |
| Sequence.IsReference                | is_reference         | ×                        |
| Sequence.IsComplete                 | is_complete          | Complete                 |
| Sequence.Strand                     | covv_strand          | ×                        |
| Sequence.Length                     | sequence_length      | Length                   |
| Sequence.GC%                        | gc_content           | ×                        |
| Sequence.N%                         | n_content            | ×                        |
| Sequence.Clade                      | covv_clade           | Lineage (GISAID Clade)   |
| Sequence.Lineage                    | covv_lineage         | Lineage (GISAID Clade)   |
| Virus.TaxonomyID                    | ✓                    | ✓                        |
| Virus.TaxonomyName                  | ✓                    | ×                        |
| Virus.Species                       | ✓                    | ×                        |
| Virus.Genus                         | covv_type            | Type                     |
| Virus.Subfamily                     | ✓                    | ×                        |
| Virus.Family                        | ✓                    | ×                        |
| Virus.EquivalentList                | ✓                    | ×                        |
| Virus.MoleculeType                  | ✓                    | ×                        |
| Virus.SingleStranded                | ✓                    | ×                        |
| Virus.PositiveStranded              | ✓                    | ×                        |
| HostSample.TaxonomyID               | ✓                    | ×                        |
| HostSample.TaxonomyName             | covv_host            | Host                     |
| HostSample.CollectionDate           | covv_collection_date | Collection date          |
| HostSample.IsolationSource          | covv_specimen        | Specimen source          |
| HostSample.Originating Lab          | covv_orig_lab        | Originating lab, Address |
| HostSample.GeoGroup                 | covv_location        |                          |
| HostSample.Country                  | covv_location        |                          |
| HostSample.Region                   | covv_location        | Location                 |
| HostSample.Age                      | ×                    | Patient age              |
| HostSample.Gender                   | ×                    | Gender                   |
| ExperimentType.SequencingTechnology | ×                    | Sequencing Technology    |
| ExperimentType.AssemblyMethod       | ×                    | Assembly method          |
| ExperimentType.Coverage             | ×                    | Coverage                 |
| SequencingProject.SubmissionDate    | covv_subm_date       | Submission date          |
| SequencingProject.SequencingLab     | covv_subm_lab        | Submitting lab, Address  |
| SequencingProject.DatabaseSource    | ✓                    | ×                        |
| SequencingProject.BioprojectId      | ×                    | ×                        |
